# Supplementary material
Source: PubMed Central journal article supplement (PMC4148589)
Supplement: NIHMS60017-supplement-01.pdf [file NIHMS60017-supplement-01.pdf]

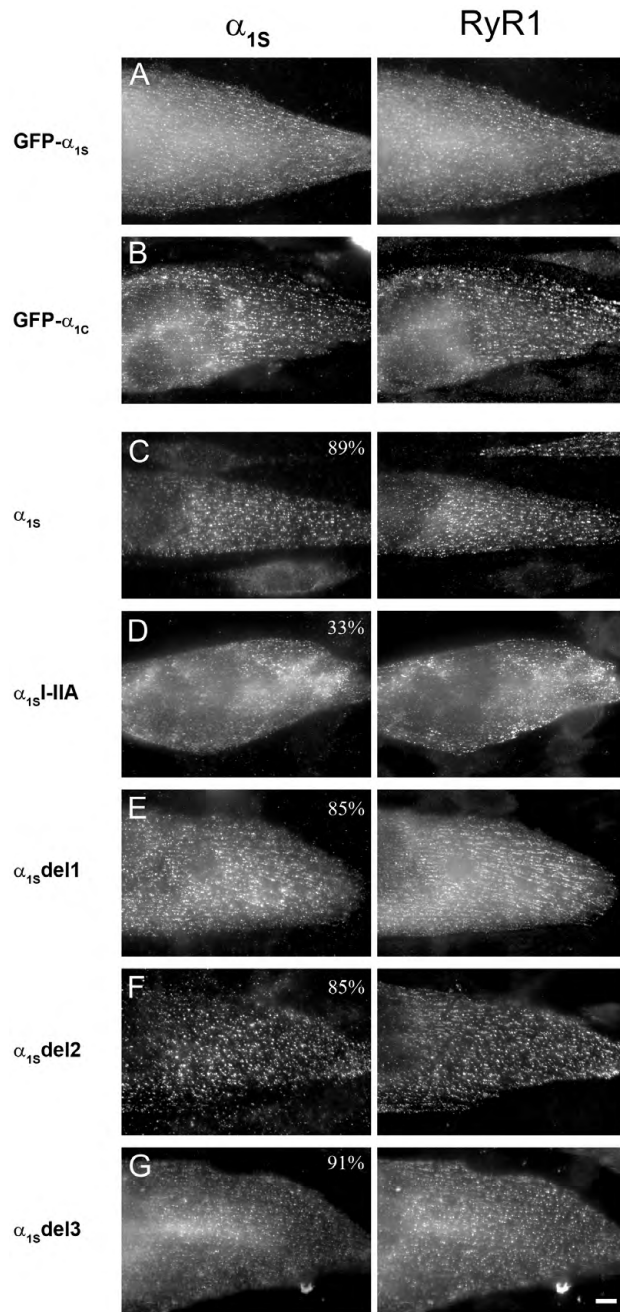

**Fig. S1. Normal incorporation of heterologously expressed  $\alpha_1$  constructs in t tubule/SR junctions of dysgenic myotubes.**

Double immunofluorescence labeling of  $\alpha_1$  subunits (A,B anti GFP, C-G mAb1A) and RyRs shows that GFP- $\alpha_{1S}$ , GFP- $\alpha_{1C}$ ,  $\alpha_{1S}$ ,  $\alpha_{1S}$ -I-IIA, and  $\alpha_{1S}$  del1-3 subunits can colocalize with RyRs in clusters, presumably representing triad junctions and peripheral couplings. The number at the right shows the percentage of transfected myotubes in which the expressed  $\alpha_1$  subunit isoform/chimera achieved a clustered distribution indicative of correct triad targeting. Note that the percentage of transfected myotubes in which  $\alpha_{1S}$ -I-IIA achieved a clustered distribution was dramatically reduced compared to the other  $\alpha_{1S}$  subunits (cf. Fig. 4B). Bar, 10  $\mu$ m.

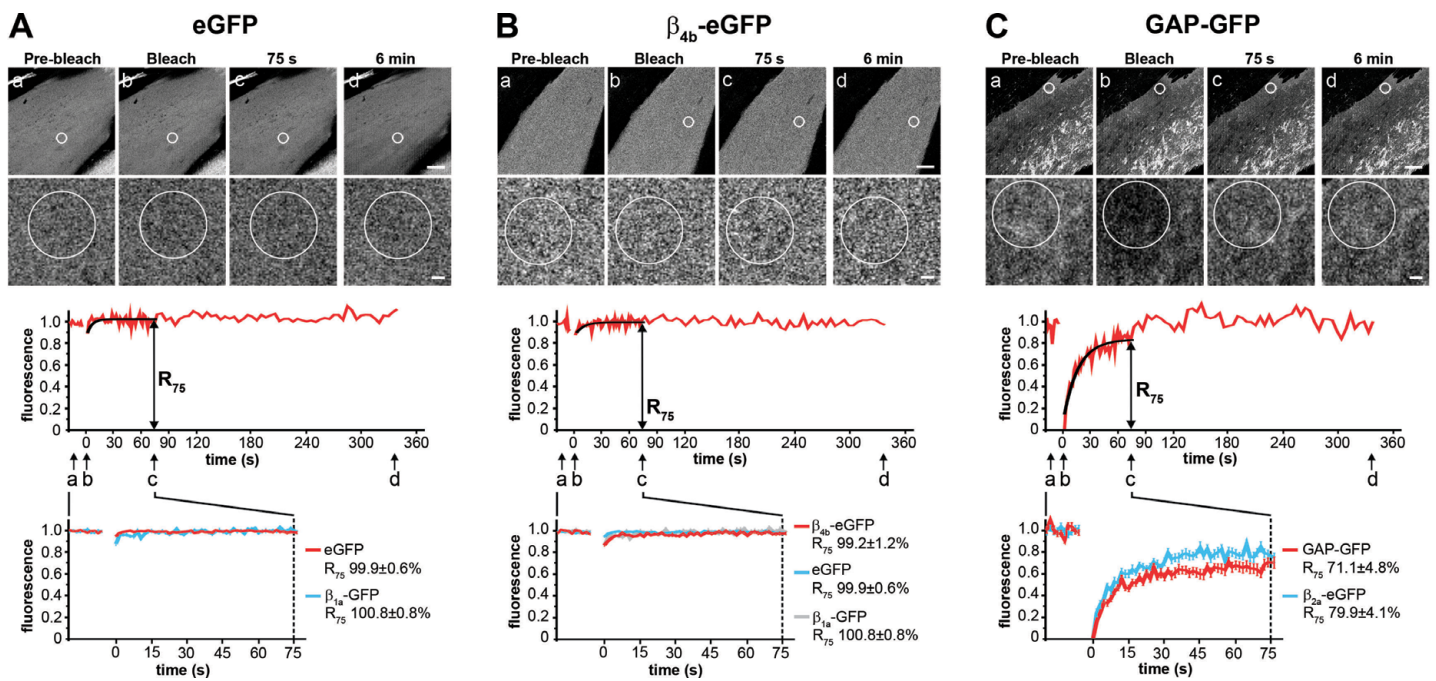

**Fig. S2. FRAP analysis of eGFP,  $\beta_{4b}$ -eGFP, and GAP-GFP.** A: soluble eGFP expressed in dysgenic myotubes is diffusely distributed and its fluorescence recovers instantaneously after photobleaching (red, mean $\pm$ SE, N=1 n=10), similar to when  $\beta_{1a}$ -GFP is expressed without an  $\alpha_1$  subunit (blue, from Fig. 2B'). B:  $\beta_{4b}$ -eGFP expressed without an  $\alpha_1$  subunit in dysgenic myotubes is also diffusely distributed and its fluorescence recovers within few seconds after photobleaching (red, mean $\pm$ SE, N=2 n=15), similar to eGFP (blue) and  $\beta_{1a}$ -GFP (gray, from Fig. 2B'). In contrast GAP-GFP, a palmitoylated GFP containing the 20 aa membrane anchoring sequence of GAP-43, is localized in the plasma membrane and its fluorescence fully recovers within 6 min after bleaching (red, mean $\pm$ SE, N=1 n=7), similar to when the palmitoylated  $\beta_{2a}$ -eGFP subunit is expressed without an  $\alpha_1$  subunit (blue, from Fig. 3B). Upper bar, 10  $\mu$ m; lower bar, 1  $\mu$ m.

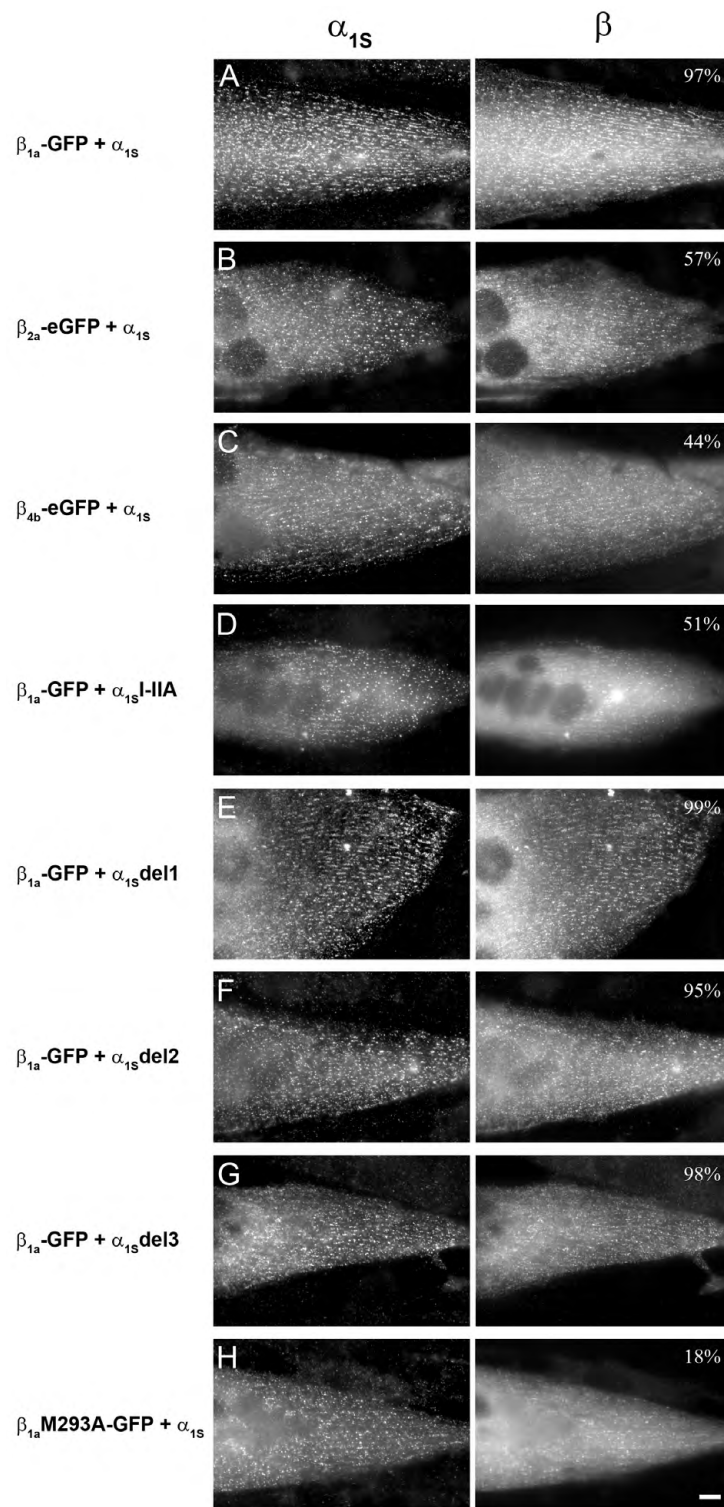

**Fig. S3. Clustering of different  $\alpha_1$ - $\beta$  subunits combinations.** Double immunofluorescence labeling of  $\alpha_{1S}$  (mAB1A) and  $\beta$  (anti-GFP) subunits shows that different  $\beta$  isoforms can co-cluster with all the used  $\alpha_{1S}$  channels. The number at the right shows the percentage of  $\alpha_{1S}$  clustered myotubes in which the expressed  $\beta$  subunit co-clustered with the  $\alpha_1$  subunit. Note that lower co-clustering corresponds to higher mobility of the  $\beta$  subunit (cf. Fig. 2C, 2D, 4F), with the exception of  $\beta_{1a}$ -GFP +  $\alpha_1$ -IIA. Bar, 10  $\mu$ m.

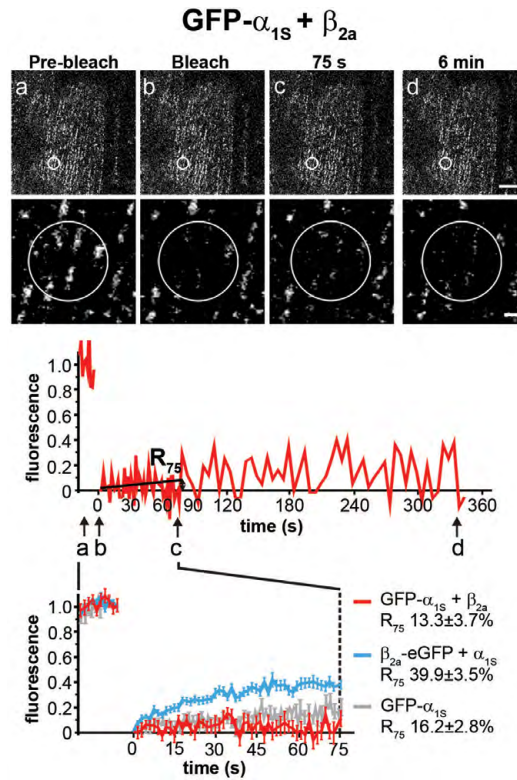

**Fig. S4. GFP- $\alpha_{1S}$  clusters are immobile independently of the co-expressed  $\beta$  subunit.** Co-expressed with  $\beta_{2a}$ -V5, the fluorescence of GFP- $\alpha_{1S}$  clusters does not recover within 6 min after bleaching (red, mean $\pm$ SE, N=3 n=11), while  $\beta_{2a}$ -eGFP coexpressed with  $\alpha_{1S}$  shows a 3-folds higher FRAP rate (blue, from Fig. 2C'), indicating that the  $\beta_{2a}$  subunit dynamically interacts with the channel complex. The low mobility of GFP- $\alpha_{1S}$  when coexpressed with  $\beta_{2a}$ -V5 is not significantly different from that of GFP- $\alpha_{1S}$  coexpressed with  $\beta_{1a}$  (grey, from Fig. 1A). Upper bar, 10  $\mu$ m; lower bar, 1  $\mu$ m.

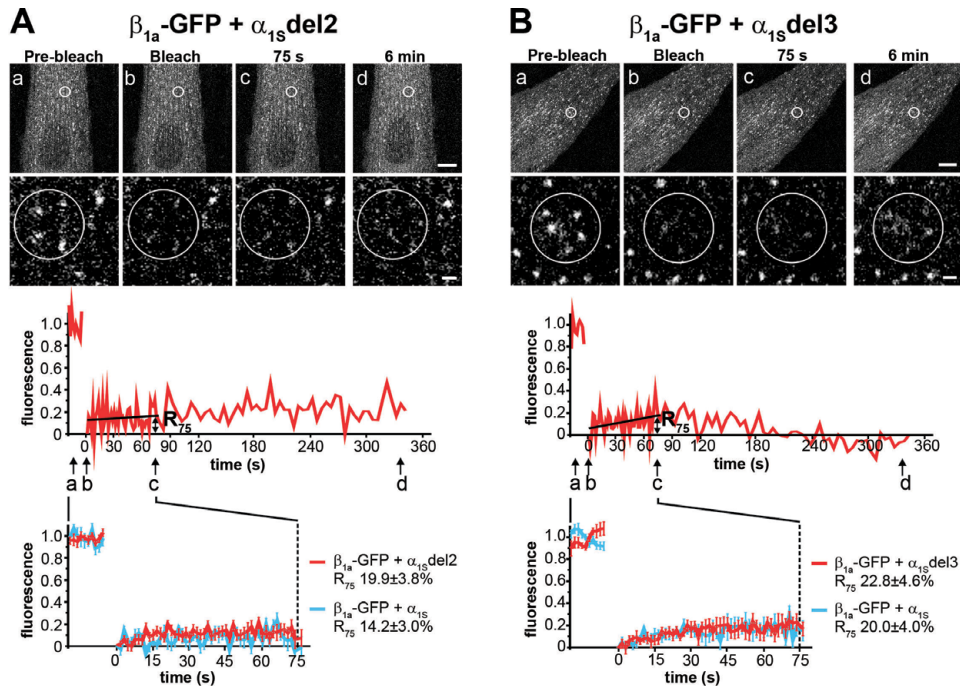

**Fig. S5. Altered  $\alpha_{1S}$  I-II loop orientation does not affect the mobility of  $\beta_{1a}$ -GFP.** In  $\alpha_{1S}$ del2 and  $\alpha_{1S}$ del3, two or three amino acids in the proximal I-II loop were deleted (similar to  $\alpha_{1S}$ del1, Fig. 4A, 4E). When coexpressed with  $\alpha_{1S}$ del2 (A) or with  $\alpha_{1S}$ del3 (B),  $\beta_{1a}$ -GFP fluorescence did not recover within 6 min after bleaching. With both constructs the mean recovery curves and  $R_{75}$  (mean $\pm$ SE;  $\alpha_{1S}$ del2 N=3 n=17,  $\alpha_{1S}$ del3 N=3 n=10) were similar to that of  $\beta_{1a}$ -GFP coexpressed with the wildtype  $\alpha_{1S}$ . Upper bar, 10  $\mu$ m; lower bar, 1  $\mu$ m.

|                                        | average cluster area ( $\mu\text{m}^2$ ) | average cluster intensity (a.u.) | average cell intensity (a.u.) | $R_{75}$ F recovery (%) |
|----------------------------------------|------------------------------------------|----------------------------------|-------------------------------|-------------------------|
| $\beta_{1a}\text{-GFP} + \alpha_{1S}$  | $0.098 \pm 0.004$                        | $38193 \pm 1087$                 | $6467 \pm 420$                | $15.4 \pm 1.7$          |
| $\beta_{2a}\text{-eGFP} + \alpha_{1S}$ | $0.156 \pm 0.014$                        | $38742 \pm 1056$                 | $9594 \pm 826$                | $35.6 \pm 3.0$          |
| $\beta_{4b}\text{-eGFP} + \alpha_{1S}$ | $0.094 \pm 0.004$                        | $38316 \pm 1285$                 | $8221 \pm 575$                | $32.9 \pm 2.4$          |

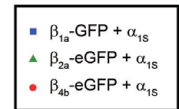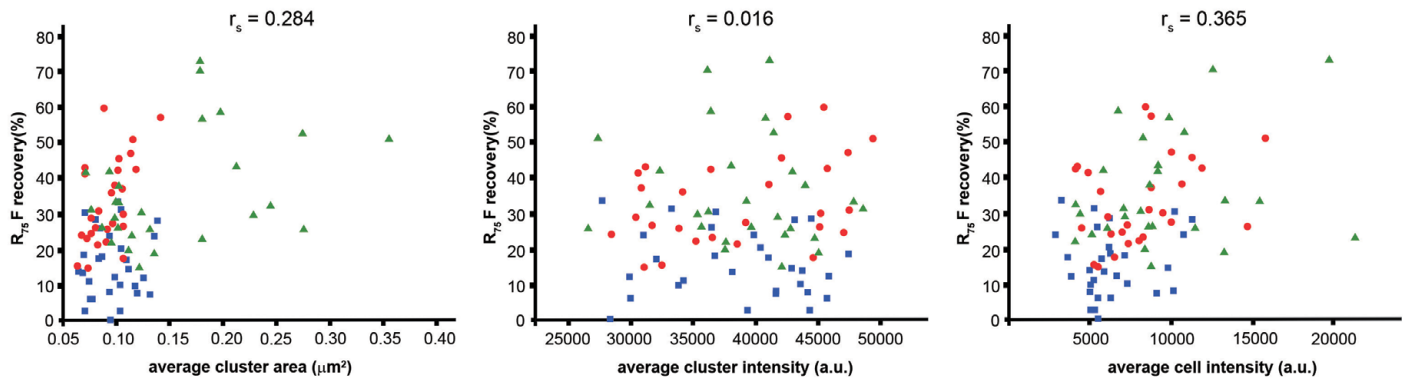

**Fig. S6. FRAP rates do not correlate with cluster size and expression level of  $\beta$  subunits.** To examine whether the variability of expression levels or differences in the subcellular distribution of the constructs influenced the FRAP data we measured and compared the average fluorescence intensity of the recorded myotubes, as well as the average size and fluorescence intensity of the clusters. Images of the myotubes used in FRAP experiments ( $n_{\beta_{1a}\text{-GFP}+\alpha_{1S}} = 32$ ,  $n_{\beta_{2a}\text{-eGFP}+\alpha_{1S}} = 34$ ,  $n_{\beta_{4b}\text{-aGFP}+\alpha_{1S}} = 28$ ) were cluster-thresholded using the automatic multilevel thresholding method by Yen (Image J, National Institutes of Health, Bethesda). Images in which automatic thresholding failed to highlight clusters were excluded ( $n_{\beta_{1a}\text{-GFP}+\alpha_{1S}} = 3$ ,  $n_{\beta_{2a}\text{-eGFP}+\alpha_{1S}} = 7$ ,  $n_{\beta_{4b}\text{-aGFP}+\alpha_{1S}} = 1$ ). The thresholded images were calibrated and an integrated morphometric analysis of cluster area and intensity was performed using Methamorph software. Expression levels were estimated by analyzing the average fluorescence intensity (background subtracted) of each recorded cell and calculating the mean  $\pm$  standard error (SE) for each construct in MS Excel. Anova with Tukey post-hoc analysis of the average cluster area, average cluster intensity and average cell intensity and  $R_{75}$  values were performed using SPSS statistical software (SPSS Inc., Chicago IL, USA) and Spearman correlation tests of each of the three parameters against the  $R_{75}$  values were performed. The table shows that the means of the average cluster area and of the average cell intensity, but not of the average cluster intensity, vary between the three examined  $\beta$  subunits. The values of average cluster area of the palmitoylated/membrane associated  $\beta_{2a}$  is significantly ( $p < 0.001$ ) higher than those of  $\beta_{1a}$  and  $\beta_{4b}$ , and the average cell intensity of  $\beta_{2a}$  is significantly ( $p = 0.002$ ) higher than that of  $\beta_{1a}$ . Note that the means of the two non-palmitoylated isoforms  $\beta_{1a}$  and  $\beta_{4b}$  were not significantly different from each other, even though their fractional FRAP were significantly different ( $p < 0.001$ ). Conversely, the mean cluster size of  $\beta_{2a}$  was significantly higher than that of  $\beta_{4b}$  even though their FRAP values were similar. These findings do not indicate a correlation of FRAP and cluster size or expression levels. Also a correlation analysis of each of the three measured parameters with the fractional FRAP ( $R_{75}$ ) values recorded in the same cell did not reveal any correlation between overall expression levels, cluster size or fluorescence intensity of clusters and the obtained FRAP values. The scatter blots and correlation coefficients below 0.4 indicate weak to no correlation.
